# Supplementary material
Source: PubMed Central journal article supplement (PMC2276367)

## SUPPLEMENTAL FIGURE LEGENDS

**Supplemental Figure 1.** Strains, cultures and qPCRs were identical to those described in Figure 4, panels A and B. IP/IN values were calculated as follows:  $[\text{DAL5P}]^{\text{IP}}/[\text{DAL5P}]^{\text{IN}}$  and  $[\text{DAL5U}]^{\text{IP}}/[\text{DAL5U}]^{\text{IN}}$ , normalized to the  $[\text{DAL5P}]^{\text{IP}}/[\text{DAL5P}]^{\text{IN}}$  value obtained with wild-type induced cells. Histograms represent the average of at least two experiments from independent cultures. Error bars indicate standard errors.

**Supplemental Figure 2.** Strains, cultures and qPCRs were identical to those described in Figure 7, panels A and B. IP/IN values were calculated as follows:  $[\text{DAL5P}]^{\text{IP}}/[\text{DAL5P}]^{\text{IN}}$  and  $[\text{DAL5U}]^{\text{IP}}/[\text{DAL5U}]^{\text{IN}}$ , normalized to the  $[\text{DAL5P}]^{\text{IP}}/[\text{DAL5P}]^{\text{IN}}$  value obtained with wild-type induced cells. Histograms represent the average of at least two experiments from independent cultures. Error bars indicate standard errors.

# Supplemental Figure 1

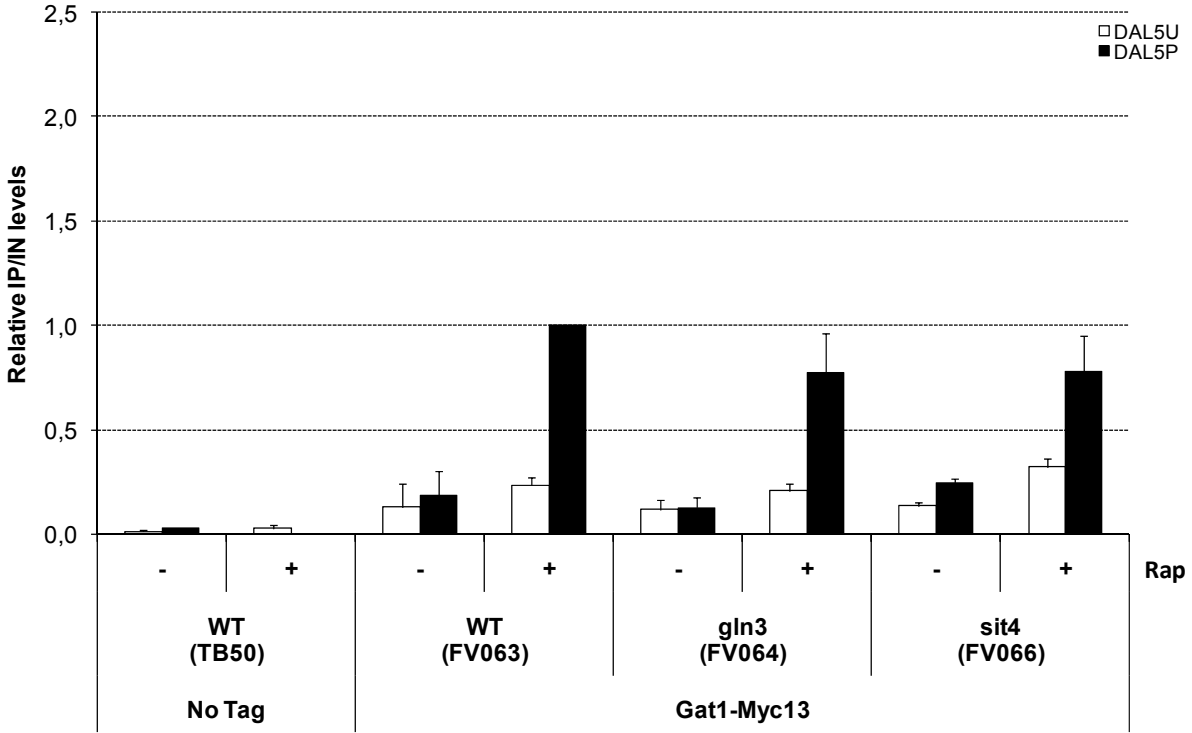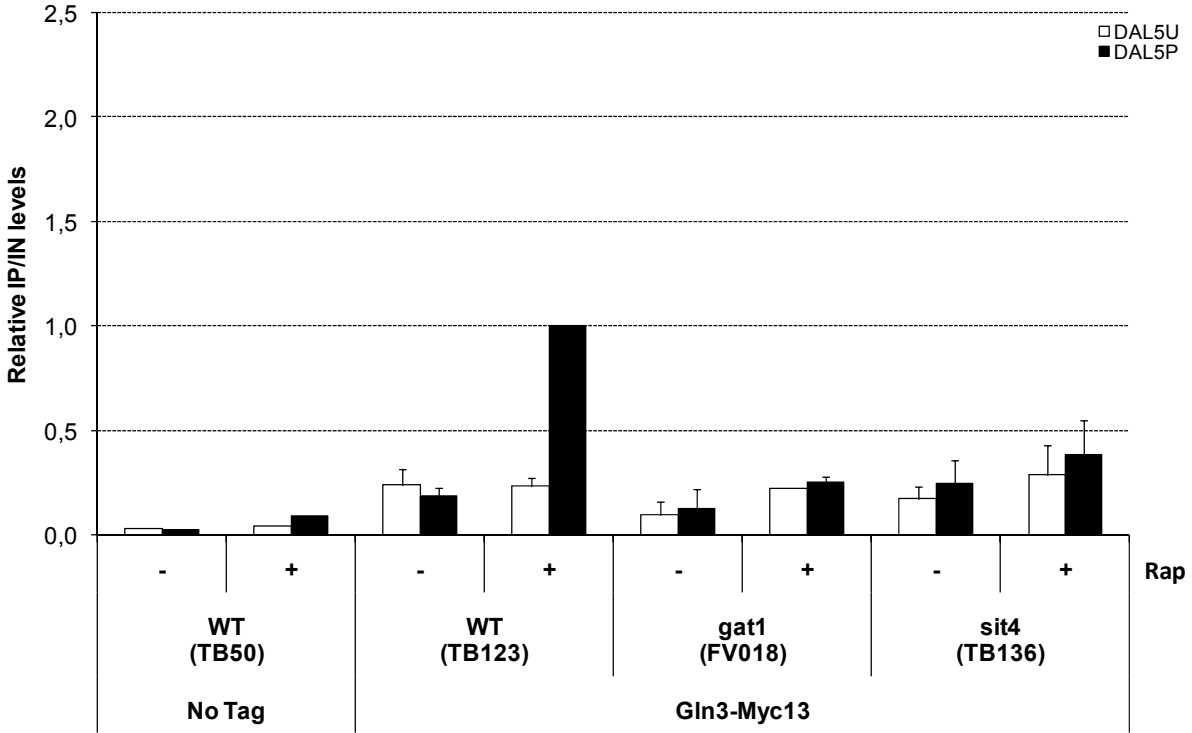

### Supplemental Figure 2

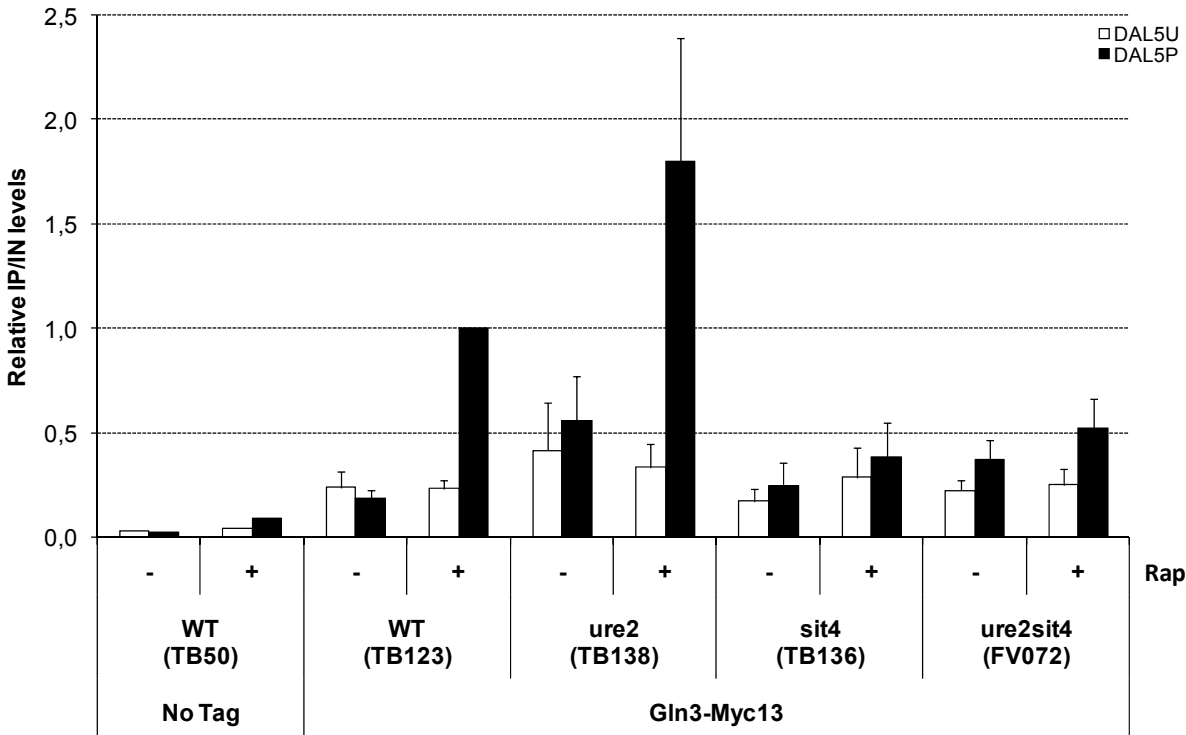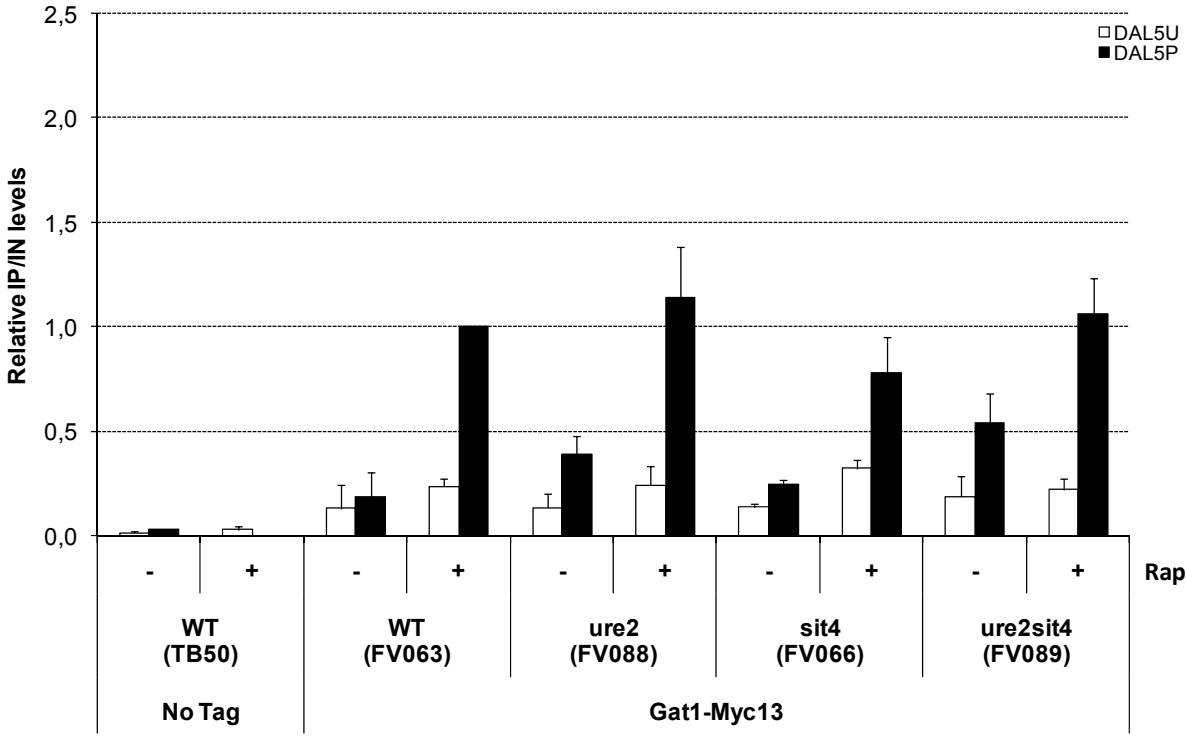

Supplement: jbc_M708811200_1.pdf [file jbc_M708811200_1.pdf]
